# Supplementary material for: Continuous hydroamination in a liquid–liquid two-phase systemElectronic supplementary information (ESI) available: experimental details. See http://www.rsc.org/suppdata/cc/b1/b111630d/
Source: Royal Society of Chemistry journal article supplement (doi:10.1039/b111630d), 2002-03-26
Supplement: b111630d.pdf [file b111630d.pdf]

## Electronic supplementary information

Experimental details:

A) A mixture of  $\text{Zn}(\text{CF}_3\text{SO}_3)_2$  (32 mg, 88  $\mu\text{mol}$ ), 1-ethyl-3-methylimidazolium-trifluoromethanesulfonate (Tokyo Kasei Kogyo Co., Ltd., 0.5  $\text{cm}^3$ ) and toluene (25  $\text{cm}^3$ ) was heated to reflux temperature. The reaction was started by addition of the substrate (0.1  $\text{cm}^3$ , 0.88 mmol). Samples were taken for GC analysis.

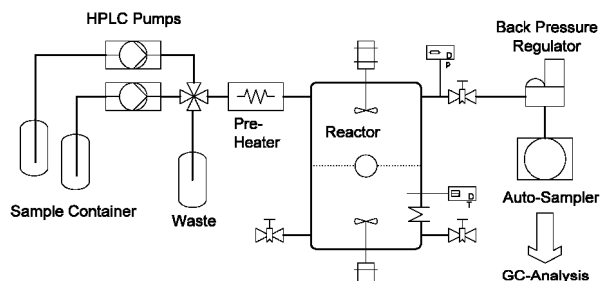

**Fig. 1** Experimental set-up used for continuous hydroamination in a liquid-liquid two-phase system.

B) The reactor was filled with a solution of  $\text{Zn}(\text{CF}_3\text{SO}_3)_2$  in 1-ethyl-3-methylimidazolium trifluoromethanesulfonate (0.28  $\text{mol dm}^{-3}$ , 34.5  $\text{cm}^3$ ).<sup>1</sup> The remaining reaction space was filled with heptane (35.5  $\text{cm}^3$ ). The upper organic phase was exchanged continuously with a solution of 6-aminohex-1-yne in heptane ( $22 \cdot 10^{-3}$   $\text{mol dm}^{-3}$ , flow 2.5 to 10  $\text{cm}^3 \text{min}^{-1}$ ). The effluent was collected for analysis by GC chromatography.

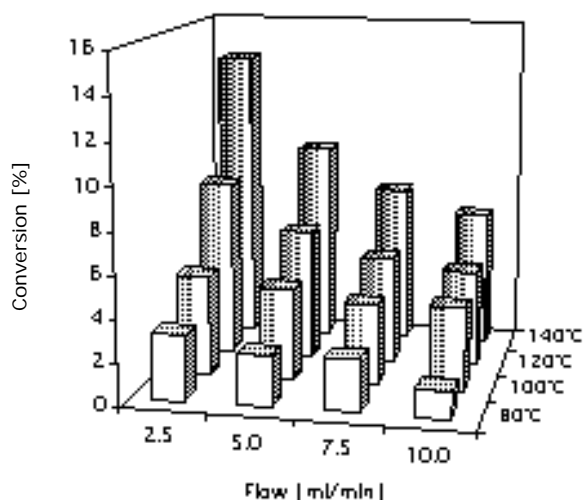

**Fig. 2** Conversion of 6-aminohex-1-yne in the two-phase reactor at different residence times (flow) and temperatures. The selectivity to the product was in all cases 100%.

## Notes and references

- 1 for details of the two-phase reactor see V. N. Nguyen, A. Wanner, H. Tiltscher, J. A. Lercher, *Catalysis Today*, 2001, **2356**, 1.
